# Supplementary material for: Clinical Prediction Models for Heart Failure Hospitalization in Type 2 Diabetes: A Systematic Review and Meta‐Analysis
Source: PubMed Central journal article supplement — J Am Heart Assoc. 2022 May 16;11(10):e024833. doi: 10.1161/JAHA.121.024833 (PMC9238543; doi:10.1161/jaha.121.024833), 2022-05-16
Supplement: JAH3-11-e024833-s001.pdf [file JAH3-11-e024833-s001.pdf]

# **SUPPLEMENTAL MATERIAL**

## **Data S1. Detailed Description of Internal- and External Validation, and Measures Used to Evaluate These Metrics.**

A clinical prediction models' performance may be evaluated in internal- or external validation. Internal validation reflects a models' reproducibility, and it includes apparent validation, where the model is validated in the derivation cohort; split-sample validation, where the data is randomly split into a training and validation set; bootstrapping, where multiple training and validation datasets are created by random draw; and cross-validation, where training is done in a random segment of the cohort and tested in the remaining part.<sup>8</sup> External validation conversely reflects a models' generalizability, and it includes geographic validation, where validation is done in another country or center; independent validation, where validation is done by other researchers; and temporal validation, where validation is done using data from a different period.<sup>8,56</sup>

Model performance is normally evaluated through discrimination and calibration. Discrimination reflects a model's ability to distinguish between patients who do and do not experience an outcome of interest.<sup>14</sup> Discrimination is frequently assessed with measures of concordance (e.g., c-statistic, AUC) and it can range between 0.5 for a model no better than the play of chance to 1.0 for a perfect model.<sup>57</sup> Concordance estimates the probability that a randomly selected patient who experienced an outcome had a higher predicted risk than a patient who did not. Calibration reflects a model's predictive accuracy: i.e., the agreement between the predicted probability of events and the actual proportion of events observed.<sup>14</sup> Calibration is frequently assessed with statistical tests for goodness-of-fit (e.g., Hosmer-Lemeshow,  $p < 0.05$  signifies poor calibration), or graphical plots for visual assessment (e.g., calibration plot slope  $< 0.7$  signifies poor calibration).<sup>58-60</sup> Less common performance measures are described elsewhere and include  $R^2$ , Brier score, sensitivity, specificity, accuracy, and net reclassification.<sup>61</sup>

**Table S1. Systematic Search Algorithms.**

|                                                                                                                                                                                                                                                                                                                                                                                                                                                                                                                                                                                                                                                                                                                                                                                                                                                                                                                                                                                                                                                                                                                                                                                                                                                                                                                                                                                                                                                                                                                                                                                                                                                                                                                      |
|----------------------------------------------------------------------------------------------------------------------------------------------------------------------------------------------------------------------------------------------------------------------------------------------------------------------------------------------------------------------------------------------------------------------------------------------------------------------------------------------------------------------------------------------------------------------------------------------------------------------------------------------------------------------------------------------------------------------------------------------------------------------------------------------------------------------------------------------------------------------------------------------------------------------------------------------------------------------------------------------------------------------------------------------------------------------------------------------------------------------------------------------------------------------------------------------------------------------------------------------------------------------------------------------------------------------------------------------------------------------------------------------------------------------------------------------------------------------------------------------------------------------------------------------------------------------------------------------------------------------------------------------------------------------------------------------------------------------|
| <p>Database: Ovid MEDLINE(R) ALL &lt;1946 to February 24, 2021&gt; 1,054 records</p> <ol style="list-style-type: none"> <li>1. *diabetes mellitus, type 2/</li> <li>2. (diabet* and ("type 2" or "type ii" or non-insulin* or noninsulin*)).mp.</li> <li>3. (T2DM or DMT2 or TIIDM or DMTII or NIDDM).mp.</li> <li>4. exp *heart failure/</li> <li>5. ((heart or cardiac or myocardial) adj2 failure*).mp.</li> <li>6. ((prognos* or predict* or risk* or strati*) and (model* or tool* or scor* or index or nomogram* or formula* or staging or calculat* or equation* or strati* or chart* or function* or engine* or algorithm*)).ti,ab,kw.</li> <li>7. *risk assessment/ or exp *risk factors/ or *multivariate analysis/ or exp regression analysis/ or exp survival analysis/ or disease-free survival/ or kaplan-meier estimate/ or progression-free survival/ or proportional hazards models/ or logistic models/ or nomograms/ or area under curve/ or exp models, statistical/</li> <li>8. ("disease free survival" or "proportional hazard* model*" or (survival adj2 anal*) or "kaplan-meier estimate*" or "progression-free survival" or develop* or (cox adj3 (model* or anal*)) or (random adj2 forest*) or regress* or (logistic* adj2 model*) or multivari* or (likelihood adj2 function) or (area under adj2 curve) or (statistical adj3 model*) or discrimin* or calibrat* or valid* or "integer-based" or "support vector*" or (machine adj2 learning*) or mathematic* or concordance* or c-statistic* or c-ind* or hosmer-lemeshow* or hazard* or wald* or "survival rate*" or "survival time*" or "survival funct*").mp.</li> </ol> <p>(1 or 2 or 3) and (4 or 5) and 6 and (7 or 8)</p>       |
| <p>Database: Embase Classic+Embase &lt;1947 to February 24, 2021&gt; 3,473 records</p> <ol style="list-style-type: none"> <li>1. exp *non insulin dependent diabetes mellitus/</li> <li>2. (diabet* and ("type 2" or "type ii" or non-insulin* or noninsulin*)).mp.</li> <li>3. (T2DM or DMT2 or TIIDM or DMTII or NIDDM).mp.</li> <li>4. exp *heart failure/</li> <li>5. ((heart or cardiac or myocardial) adj2 failure*).mp.</li> <li>6. (prognosis/) and (model/)</li> <li>7. ((prognos* or predict* or risk* or strati*) and (model* or tool* or scor* or index or nomogram* or formula* or staging or calculat* or equation* or strati* or chart* or function* or engine* or algorithm*)).ti,ab,kw.</li> <li>8. exp risk assessment/ or exp risk factor/ or exp multivariate analysis/ or exp regression analysis/ or *disease free survival/ or exp proportional hazards model/ or *statistical model/ or exp nomograms/ or *area under the curve/ or exp mathematical phenomena/</li> <li>9. ("disease free survival" or "proportional hazard* model*" or (survival adj2 anal*) or "kaplan-meier estimate*" or "progression-free survival" or develop* or (cox adj3 (model* or anal*)) or (random adj2 forest*) or regress* or (logistic* adj2 model*) or multivari* or (likelihood adj2 function) or (area under adj2 curve) or (statistical adj3 model*) or discrimin* or calibrat* or valid* or "integer-based" or "support vector*" or (machine adj2 learning*) or mathematic* or concordance* or c-statistic* or c-ind* or hosmer-lemeshow* or hazard* or wald* or "survival rate*" or "survival time*" or "survival funct*").mp.</li> </ol> <p>(1 or 2 or 3) and (4 or 5) and (6 or 7) and (8 or 9)</p> |
| <p>Database: Web of Science Core Collection &lt;database inception to February 24, 2021&gt; 1,426 records</p> <ol style="list-style-type: none"> <li>1. ts= (diabet* and ("type 2" or "type ii" or noninsulin or "non-insulin"))</li> <li>2. ts=((heart or cardiac or myocardial) near/2 failure*)</li> <li>3. ts=((prognos* or predict* or risk* or strati*) and (model* or tool* or scor* or index or nomogram* or formula* or staging or calculat* or equation* or strati* or chart* or function* or engine* or algorithm*))</li> <li>4. ts=("disease free survival" or "proportional hazard* model*" or (survival near/2 anal*) or "kaplan-meier estimate*" or "progression-free survival" or develop* or (cox near/3 (model* or anal*)) or (random near/2 forest*) or regress* or (logistic* near/2 model*) or multivari* or (likelihood near/2 function) or (area under near/2 curve) or (statistical near/3 model*) or discrimin* or calibrat* or valid* or "integer-based" or "support vector*" or (machine near/2 learning*) or mathematic* or concordance* or c-statistic* or c-ind* or hosmer-lemeshow* or hazard* or wald* or "survival rate*" or "survival time*" or "survival funct*")</li> </ol> <p>#1 AND #2 AND #3 AND #4</p>                                                                                                                                                                                                                                                                                                                                                                                                                                                                       |

Database: Google Scholar <database inception to February 24, 2021> first 200 records

1. "type 2"
2. "diabetes"
3. "heart failure"
4. ("risk" or "prediction" or "stratification" or "model")

1 and 2 and 3 and 4

Database: Tufts Predictive Analytics and Comparative Effectiveness Clinical Prediction Model Registry <database inception to February 24, 2021> 37 records

1. Keyword contains: diabetes
2. Outcome contains: heart failure
3. Outcome contains: composite
4. Outcome contains: hospitalization

1 and (2 or 3 or 4)

**Table S2. List of Excluded Studies Cataloged by Reason for Exclusion.**

| <b>EXCLUDED: NOT A MODEL DEVELOPMENT, UPDATE, OR VALIDATION STUDY</b> |                                                                                                                                                                                                                                                                                                                                                           |
|-----------------------------------------------------------------------|-----------------------------------------------------------------------------------------------------------------------------------------------------------------------------------------------------------------------------------------------------------------------------------------------------------------------------------------------------------|
| 1.                                                                    | Akter, S., et al. "Predictors of Incident Heart Failure in Community-Dwelling Older Adults with Diabetes Mellitus." <i>Diabetologia</i> , vol. 53, Sept. , p. S85.                                                                                                                                                                                        |
| 2.                                                                    | Altrabsheh, E., et al. "Pdb64 Association between Cardiovascular Disease Risk Factors and Hypoglycaemic Events in Type 2 Diabetes Using the Iqvia Core Diabetes Model." <i>Value in Health</i> , vol. 22, May , p. S151.                                                                                                                                  |
| 3.                                                                    | Ang, Donald SC, et al. "A Comparison between B-Type Natriuretic Peptide, Global Registry of Acute Coronary Events (GRACE) Score and Their Combination in ACS Risk Stratification." <i>Heart</i> , vol. 95, no. 22, 2009, pp. 1836–42.                                                                                                                     |
| 4.                                                                    | Blin, P., et al. "Real World Risk of Major Outcomes for Type 2 Diabetes with Stable Coronary Artery Disease without Prior MI or Stroke and THEMIS-like Patients Using the SNDS French Nationwide Claims Database." <i>European Heart Journal</i> , vol. 41, Nov. , p. 1314.                                                                               |
| 5.                                                                    | Breunig, I. M., et al. "Development of Heart Failure in Medicaid Patients with Type 2 Diabetes Treated with Pioglitazone, Rosiglitazone, or Metformin." <i>Journal of Managed Care &amp; Specialty Pharmacy</i> , vol. 20, no. 9, Sept. , pp. 895–903.                                                                                                    |
| 6.                                                                    | Bucher, S., et al. "Predictive factors of hospitalization in non institutionalized elderly diabetic patients. Data from the S.AGES cohort." <i>Exercer-La Revue Francophone De Medecine Generale</i> , no. 146, Oct. , pp. 340–47.                                                                                                                        |
| 7.                                                                    | Davis, W. A., et al. "Contemporary Cardiovascular Risk Assessment for Type 2 Diabetes Including Heart Failure as an Outcome: The Fremantle Diabetes Study Phase II." <i>Journal of Clinical Medicine</i> , vol. 9, no. 5, May .                                                                                                                           |
| 8.                                                                    | Fadini, G. P., et al. "Risk of Hospitalization for Heart Failure in Patients with Type 2 Diabetes Newly Treated with DPP-4 Inhibitors or Other Oral Glucose-Lowering Medications: A Retrospective Registry Study on 127,555 Patients from the Nationwide OsMed Health-DB Database." <i>European Heart Journal</i> , vol. 36, no. 36, Sept. , pp. 2454–62. |
| 9.                                                                    | Foos, V., et al. "Validation and Evaluation of the Risk-to-Benefit Ratio of Glucose Lowering Therapies in High Cardiovascular Risk Type 2 Diabetes Patients; Projections Using the IMS CORE Diabetes Model." <i>Diabetes</i> , vol. 61, June , p. A36.                                                                                                    |
| 10.                                                                   | Garcia Carretero, R., et al. "Cardiovascular Prognostic Factors in Prediabetic Patients within a Hypertensive Population." <i>Journal of Hypertension</i> , vol. 36, June , p. e25.                                                                                                                                                                       |
| 11.                                                                   | Gokhale, M., et al. "Calendar Time as an Instrumental Variable in Assessing the Risk of Heart Failure with Antihyperglycemic Drugs." <i>Pharmacoepidemiology and Drug Safety</i> , vol. 25, Aug. , pp. 45–46.                                                                                                                                             |
| 12.                                                                   | Halon, D. A., et al. "Prediction of Heart Failure in Asymptomatic Type 2 Diabetics: An 8 Year Prospective Study Following Cardiac CT Angiography." <i>European Journal of Heart Failure</i> , vol. 19, May , p. 178.                                                                                                                                      |
| 13.                                                                   | Hayes, A. J., et al. "An Improved Model to Estimate Lifetime Health Outcomes of Patients with Type 2 Diabetes Using 30-Year Follow-up Data from the United Kingdom Prospective Diabetes Study." <i>Diabetologia</i> , vol. 54, Sept. , p. S8.                                                                                                             |
| 14.                                                                   | Jhund, P., et al. "NT-ProBNP and HsTnT Improve Cardiovascular Risk Prediction in Patients with Type 2 Diabetes Mellitus, Chronic Kidney or Cardiovascular Disease or Both." <i>Journal of the American College of Cardiology</i> , vol. 63, no. 12, 1, p. A1279.                                                                                          |
| 15.                                                                   | Kempf, Tibor, et al. "Prognostic Utility of Growth Differentiation Factor-15 in Patients with Chronic Heart Failure." <i>Journal of the American College of Cardiology</i> , vol. 50, no. 11, 2007, pp. 1054–60.                                                                                                                                          |
| 16.                                                                   | Leal, J., et al. "Temporal Validation of the UKPDS Outcomes Model Using 10-Year Posttrial Monitoring Data." <i>Diabetes Care</i> , vol. 36, no. 6, June , pp. 1541–46.                                                                                                                                                                                    |
| 17.                                                                   | Maxion-Bergemann, S., et al. "Diabetes Mellitus Model (DMM): Internal Validation of a Computer Simulation Model for Type 1 and Type 2 Diabetes." <i>Journal of Medical Economics</i> , vol. 9, no. 69, 2006, pp. 69–82.                                                                                                                                   |
| 18.                                                                   | McAlister, F. A., et al. "Association between Glycated Haemoglobin Levels and Cardiovascular Outcomes in Patients with Type 2 Diabetes and Cardiovascular Disease: A Secondary Analysis of TheTECOSrandomized Clinical Trial." <i>European Journal of Heart Failure</i> , vol. 22, no. 11, Nov. , pp. 2026–34.                                            |
| 19.                                                                   | McEwan, P., V. Foos, et al. "Approaches to Standardising Cardiovascular Risk Equation End-Points in Order to Facilitate Their Inclusion within a Type 2 Diabetes Model." <i>Value in Health</i> , vol. 20, May , p. A323.                                                                                                                                 |
| 20.                                                                   | McEwan, P., H. Bennett, et al. "Refitting of the UKPDS 68 Risk Equations to Contemporary Routine Clinical Practice Data in the UK." <i>Pharmacoeconomics</i> , vol. 33, no. 2, Feb. , pp. 149–61.                                                                                                                                                         |

|                                                                                                                                                                                                                                                                                                                                                  |
|--------------------------------------------------------------------------------------------------------------------------------------------------------------------------------------------------------------------------------------------------------------------------------------------------------------------------------------------------|
| 21. McEwan, P. "Validation of the Ukpds Outcomes Equations Using the Cardiff Type-2 Diabetes Model." <i>Value in Health</i> , vol. 16, May , p. A165.                                                                                                                                                                                            |
| 22. Monteiro, S., et al. "Pdb35 Contrasting Framingham Risk Equations in Type 2 Diabetes Using the Iqvia Core Diabetes Model." <i>Value in Health</i> , vol. 22, May , p. S145.                                                                                                                                                                  |
| 23. Neuwahl, S. J., et al. "Patient Health Utility Equations for a Type 2 Diabetes Model." <i>Diabetes Care</i> , vol. 44, no. 2, Feb. , pp. 381–89.                                                                                                                                                                                             |
| 24. Nichols, G. A., et al. "Congestive Heart Failure in Type 2 Diabetes - Prevalence, Incidence, and Risk Factors." <i>Diabetes Care</i> , vol. 24, no. 9, Sept. , pp. 1614–19.                                                                                                                                                                  |
| 25. Ono, Y., et al. "Validity of Claims Diagnosis Codes for Cardiovascular Diseases in Diabetes Patients in Japanese Administrative Database." <i>Clinical Epidemiology</i> , vol. 12, 2020, pp. 367–75.                                                                                                                                         |
| 26. Pagano, E., A. Gray, et al. "Prediction of Mortality and Macrovascular Complications in Type 2 Diabetes: Validation of the UKPDS Outcomes Model in the Casale Monferrato Survey, Italy." <i>Diabetologia</i> , vol. 56, no. 8, Aug. , pp. 1726–34.                                                                                           |
| 27. Pagano, E., S. R. A. Konings, et al. "Prediction of Mortality and Major Cardiovascular Complications in Type 2 Diabetes: External Validation of UK Prospective Diabetes Study Outcomes Model Version 2 in Two European Observational Cohorts." <i>Diabetes Obesity &amp; Metabolism</i> .                                                    |
| 28. Presley, C. A., et al. "Validation of an Algorithm to Identify Heart Failure Hospitalisations in Patients with Diabetes within the Veterans Health Administration." <i>BMJ Open</i> , vol. 8, no. 3, 2018, <a href="http://bmjopen.bmj.com/content/early/by/section">http://bmjopen.bmj.com/content/early/by/section</a> . rayyan-653723784. |
| 29. Rajagopalan, R., et al. "Association between Congestive Heart Failure and Hospitalization in Patients with Type 2 Diabetes Mellitus Receiving Treatment with Insulin or Pioglitazone: A Retrospective Data Analysis." <i>Clinical Therapeutics</i> , vol. 26, no. 9, Sept. , pp. 1400–10.                                                    |
| 30. Reynoso-Noveron, N., et al. "Estimated Incidence of Cardiovascular Complications Related to Type 2 Diabetes in Mexico Using the UKPDS Outcome Model and a Population-Based Survey." <i>Cardiovascular Diabetology</i> , vol. 10, Jan. .                                                                                                      |
| 31. Rorth, R., et al. "Risk of Incident Heart Failure in Patients With Diabetes and Asymptomatic Left Ventricular Systolic Dysfunction." <i>Diabetes Care</i> , vol. 41, no. 6, 6, pp. 1285–91.                                                                                                                                                  |
| 32. Schievink, B., et al. "Prediction of the Effect of Atrasentan on Renal and Heart Failure Outcomes Based on Short-Term Changes in Multiple Risk Markers." <i>European Journal of Preventive Cardiology</i> , vol. 23, no. 7, May , pp. 758–68.                                                                                                |
| 33. Shao, H., et al. "Updating Risk Engine for Diabetes Progression and Mortality in the United States: Internal Validation." <i>Value in Health</i> , vol. 20, May , p. A162.                                                                                                                                                                   |
| 34. Su, Z. T., et al. "The Use of Computer Simulation Modelling to Estimate Complications in Patients with Type 2 Diabetes: Validation of the Cornerstone Diabetes Simulation Model." <i>Diabetologia</i> , vol. 61, Oct. , p. S138.                                                                                                             |
| 35. Tomlin, A. M., et al. "Risk Factors for Hospitalization Due to Diabetes Complications." <i>Diabetes Research and Clinical Practice</i> , vol. 80, no. 2, May , pp. 244–52.                                                                                                                                                                   |
| 36. Yang, H., et al. "What Is the Best Model to Predict Incident Heart Failure?" <i>Journal of the American College of Cardiology</i> , vol. 67, no. 13, 5, p. 1337.                                                                                                                                                                             |
| 37. Ye, W., et al. "The Michigan Model for Coronary Heart Disease in Type 2 Diabetes: Development and Validation." <i>Diabetes Technology &amp; Therapeutics</i> , vol. 17, no. 10, Oct. , pp. 701–11.                                                                                                                                           |
| 38. Zhuo, X., et al. "External Validation of the Uk Prospective Diabetes Study Risk Equations in 14,740 Israel Type 2 Diabetes Patients." <i>Diabetes</i> , vol. 65, 2016, p. A92.                                                                                                                                                               |
| <b>EXCLUDED: INCORRECT OUTCOME</b>                                                                                                                                                                                                                                                                                                               |
| 1. Aminian, A., et al. "Predicting 10-Year Risk of End-Organ Complications of Type 2 Diabetes With and Without Metabolic Surgery: A Machine Learning Approach." <i>Diabetes Care</i> , vol. 43, no. 4, Apr. , pp. 852–59.                                                                                                                        |
| 2. Basu, S., et al. "Benefit and Harm of Intensive Blood Pressure Treatment: Derivation and Validation of Risk Models Using Data from the SPRINT and ACCORD Trials." <i>Plos Medicine</i> , vol. 14, no. 10, Oct. .                                                                                                                              |
| 3. Bergemann, R., et al. "Prediction of Acute and Chronic Complications by a New Computer Simulation Model for Type 1 and Type 2 Diabetes: The Diabetes Mellitus Model (DMM)." <i>Journal of Medical Economics</i> , vol. 9, no. 83, 2006, pp. 83–99.                                                                                            |
| 4. Bhattacharyya, S., et al. "Carotid Intima-Media Thickness, Echocardiography and Incident Cardiovascular Disease: Comparing the Predictive Performance of Ultrasound Imaging in Patients with Type 2 Diabetes (T2DM)." <i>Heart Lung and Circulation</i> , vol. 2, 2010, p. S169.                                                              |
| 5. Clarke, P. M., et al. "Using the EQ-5D Index Score as a Predictor of Outcomes in Patients With Type 2 Diabetes." <i>Medical Care</i> , vol. 47, no. 1, Jan. , pp. 61–68.                                                                                                                                                                      |

|     |                                                                                                                                                                                                                                                                                                                                                                                                                                |
|-----|--------------------------------------------------------------------------------------------------------------------------------------------------------------------------------------------------------------------------------------------------------------------------------------------------------------------------------------------------------------------------------------------------------------------------------|
| 6.  | Cosson, E., et al. "Cardiovascular Risk Prediction Is Improved by Adding Asymptomatic Coronary Status to Routine Risk Assessment in Type 2 Diabetic Patients." <i>Diabetes</i> , vol. 60, July , pp. A141–42.                                                                                                                                                                                                                  |
| 7.  | Cox, A. J., et al. "Prediction of Mortality Using a Multi-Bed Vascular Calcification Score in the Diabetes Heart Study." <i>Cardiovascular Diabetology</i> , vol. 13, no. 1, 2014, <a href="http://www.cardiab.com/home/">http://www.cardiab.com/home/</a> .                                                                                                                                                                   |
| 8.  | De Magalhaes, L. S., et al. "Ukpds: Stratification of Macrovascular Risk of People with Type 2 Diabetes Mellitus at Nucleo de Atencao Em Diabetes of Blumenau-Santa Catarina." <i>Diabetology and Metabolic Syndrome. Conference: 21st Brazilian Diabetes Society Congress. Brazil.</i> , vol. 10, 2018.                                                                                                                       |
| 9.  | Enaa, J., et al. "Derivation and validation of a predictive model for the readmission of patients with diabetes mellitus treated in internal medicine departments." <i>Revista Clinica Espanola</i> , vol. 218, no. 6, Aug. , pp. 271–78.                                                                                                                                                                                      |
| 10. | Funabashi, N., et al. "Risk Stratification of Type 2 Diabetes Mellitus Patients with Coronary Calcification for Occurrence of Major Adverse Cardiac and Cerebrovascular Events Using Coronary Agatston Score on 320 Slice CT and Quantitative Average HBA 1C Levels during Follow-Up." <i>Circulation. Conference</i> , vol. 138, 2018.                                                                                        |
| 11. | Geba, D., et al. "A Risk Prediction Model for Cardiovascular Disease-Related Death in Patients with Type 2 Diabetes Mellitus." <i>Circulation. Conference</i> , vol. 138, 2018.                                                                                                                                                                                                                                                |
| 12. | Hayden, J. D., et al. "Cardiovascular Risk Scoring and Stratification in Patients with Type 2 Diabetes Enrolled in a Medicare Advantage Plan." <i>Diabetes. Conference: 80th Scientific Sessions of the American Diabetes Association, ADA</i> , vol. 69, 2020, <a href="https://diabetes.diabetesjournals.org/content/69/Supplement_1/404-P">https://diabetes.diabetesjournals.org/content/69/Supplement_1/404-P</a> .        |
| 13. | Hillis, G. S., et al. "The Relative and Combined Ability of High-Sensitivity Cardiac Troponin T and N-Terminal Pro-B-Type Natriuretic Peptide to Predict Cardiovascular Events and Death in Patients With Type 2 Diabetes." <i>Diabetes Care</i> , vol. 37, no. 1, Jan. , pp. 295–303.                                                                                                                                         |
| 14. | Hoerger, T. J., et al. "Developing New Risk Equations to Predict Diabetes-Related Complications and Mortality in u.s. Adults with Type 2 Diabetes." <i>Diabetes. Conference: 80th Scientific Sessions of the American Diabetes Association, ADA</i> , vol. 69, 2020, <a href="https://diabetes.diabetesjournals.org/content/69/Supplement_1/1520-P">https://diabetes.diabetesjournals.org/content/69/Supplement_1/1520-P</a> . |
| 15. | J, Cederholm, et al. "Risk Prediction of Cardiovascular Disease in Type 2 Diabetes: A Risk Equation from the Swedish National Diabetes Register." <i>Diabetes Care</i> , vol. 31, no. 10, 2008, pp. 2038–43.                                                                                                                                                                                                                   |
| 16. | Lau, E., et al. "A Modified Risk Equation for Development of Coronary Heart Disease in Hong Kong Chinese with Type 2 Diabetes." <i>Diabetes Research and Clinical Practice</i> , vol. 106, Nov. , p. S17.                                                                                                                                                                                                                      |
| 17. | Lin, M. Y., et al. "Pdb57 Validation of Ukpds Outcomes and Taiwan Diabetes Models on Taiwan Type 2 Dm Population." <i>Value in Health</i> , vol. 23, May , pp. S118–19.                                                                                                                                                                                                                                                        |
| 18. | M, Woodward, et al. "Adding Social Deprivation and Family History to Cardiovascular Risk Assessment: The ASSIGN Score from the Scottish Heart Health Extended Cohort (SHHEC)." <i>Heart (British Cardiac Society)</i> , vol. 93, no. 2, 2007, pp. 172–76.                                                                                                                                                                      |
| 19. | McMurray, J. J. V., et al. "Predictors of Fatal and Nonfatal Cardiovascular Events in Patients with Type 2 Diabetes Mellitus, Chronic Kidney Disease, and Anemia: An Analysis of the Trial to Reduce Cardiovascular Events with Aranesp (Darbepoetin-Alfa) Therapy (TREAT)." <i>American Heart Journal</i> , vol. 162, no. 4, Oct. , pp. 748-U208.                                                                             |
| 20. | Mudrikova, T., et al. "Cardiovascular Risk Factors as Predictors of Mortality in Type II Diabetic Patients." <i>Wiener Klinische Wochenschrift</i> , vol. 111, no. 2, Jan. , pp. 66–69.                                                                                                                                                                                                                                        |
| 21. | Nakamura, M., et al. "Brachial-Ankle Pulse Wave Velocity as a Risk Stratification Index for the Short-Term Prognosis of Type 2 Diabetic Patients with Coronary Artery Disease." <i>Hypertension Research</i> , vol. 33, no. 10, Oct. , pp. 1018–24.                                                                                                                                                                            |
| 22. | Nishimura, Tsunehiko, et al. "Prognostic Study of Risk Stratification among Japanese Patients with Ischemic Heart Disease Using Gated Myocardial Perfusion SPECT: J-ACCESS Study." <i>European Journal of Nuclear Medicine and Molecular Imaging</i> , vol. 35, no. 2, 2008, pp. 319–28.                                                                                                                                       |
| 23. | Parrinello, C. M., et al. "Risk Prediction of Major Complications in Individuals with Diabetes: The Atherosclerosis Risk in Communities Study." <i>Diabetes Obesity &amp; Metabolism</i> , vol. 18, no. 9, Sept. , pp. 899–906.                                                                                                                                                                                                |
| 24. | Porrini, E., et al. "10-Year Cardiovascular Risk in Type 2 Diabetes Is Predicted by Measurable Urinary Albumin Even in the Normoalbuminuric Range." <i>Nephrology Dialysis Transplantation</i> , vol. 27, May , pp. ii55–56.                                                                                                                                                                                                   |
| 25. | Prausmüller, Suriya, Michael Resl, Henrike Arfsten, Georg Spinka, Raphael Wurm, Stephanie Neuhold, Philipp Bartko, et al. <i>Performance of NT-ProBNP as a Single Biomarker in Comparison to SCORE and the</i>                                                                                                                                                                                                                 |

|     |                                                                                                                                                                                                                                                                                                                                                                                                 |
|-----|-------------------------------------------------------------------------------------------------------------------------------------------------------------------------------------------------------------------------------------------------------------------------------------------------------------------------------------------------------------------------------------------------|
|     | <i>Recommended ESC/EASD Cardiovascular Risk Stratification Model for Risk Prediction in Type 2 Diabetes Mellitus</i> . 2020.                                                                                                                                                                                                                                                                    |
| 26. | Prausmüller, Suriya, Michael Resl, Henrike Arfsten, Georg Spinka, Raphael Wurm, Stephanie Neuhold, Philipp E. Bartko, et al. “Performance of the Recommended ESC/EASD Cardiovascular Risk Stratification Model in Comparison to SCORE and NT-ProBNP as a Single Biomarker for Risk Prediction in Type 2 Diabetes Mellitus.” <i>Cardiovascular Diabetology</i> , vol. 20, no. 1, 2021, pp. 1–12. |
| 27. | Resl, M., et al. “Targeted Multiple Biomarker Approach in Predicting Cardiovascular Events in Patients with Diabetes.” <i>Heart</i> , vol. 102, no. 24, Dec. , pp. 1963–68.                                                                                                                                                                                                                     |
| 28. | Tang, Olive, et al. “Performance of High-Sensitivity Cardiac Troponin Assays to Reflect Comorbidity Burden and Improve Mortality Risk Stratification in Older Adults with Diabetes.” <i>Diabetes Care</i> , vol. 43, no. 6, 2020, pp. 1200–08.                                                                                                                                                  |
| 29. | “The Detection of Ischemia in Asymptomatic Diabetics (DIAD) Study Risk Score.” <i>Diabetes</i> , vol. 61, June , p. A103.                                                                                                                                                                                                                                                                       |
| 30. | Torremocha, F., et al. “Prediction of Major Coronary Events by Coronary Risk Profile and Silent Myocardial Ischaemia: Prospective Follow-up Study of Primary Prevention in 72 Diabetic Patients.” <i>Diabetes &amp; Metabolism</i> , vol. 27, no. 1, Feb. , pp. 49–57.                                                                                                                          |
| 31. | Van Der Leeuw, J., et al. “The Validation of Cardiovascular Risk Scores for Patients with Type Diabetes Mellitus.” <i>Heart</i> , vol. 101, no. 3, 1, pp. 222–29.                                                                                                                                                                                                                               |
| 32. | Wang, Y., et al. “Comparison of the Heart Failure Risk Stratification Performance of the CKD–EPI Equation and the MDRD Equation for Estimated Glomerular Filtration Rate in Patients with Type 2 Diabetes.” <i>Diabetic Medicine</i> , vol. 33, no. 5, 2016, pp. 609–20.                                                                                                                        |
| 33. | Williams, B., et al. “A Prediction Model for Identifying Type 2 Diabetics at Highest Risk of Cardiorenal Outcomes.” <i>Journal of Cardiac Failure</i> , vol. 25, Aug. , p. S98.                                                                                                                                                                                                                 |
| 34. | Young, J. B., et al. “Development of Predictive Risk Models for Major Adverse Cardiovascular Events among Patients with Type 2 Diabetes Mellitus Using Health Insurance Claims Data.” <i>Cardiovascular Diabetology</i> , vol. 17, Aug. .                                                                                                                                                       |
|     | <b>EXCLUDED: INCORRECT PATIENT POPULATION</b>                                                                                                                                                                                                                                                                                                                                                   |
| 1.  | Arzilli, Chiara, et al. “N-Terminal Fraction of pro-B-Type Natriuretic Peptide versus Clinical Risk Scores for Prognostic Stratification in Chronic Systolic Heart Failure.” <i>European Journal of Preventive Cardiology</i> , vol. 25, no. 8, 2018, pp. 889–95.                                                                                                                               |
| 2.  | Atlantis, E., et al. “Predictive Value of Serum Testosterone for Type 2 Diabetes Risk Assessment in Men.” <i>Bmc Endocrine Disorders</i> , vol. 16, May .                                                                                                                                                                                                                                       |
| 3.  | Barthel, Petra, et al. “Reflex and Tonic Autonomic Markers for Risk Stratification in Patients with Type 2 Diabetes Surviving Acute Myocardial Infarction.” <i>Diabetes Care</i> , vol. 34, no. 8, 2011, pp. 1833–37.                                                                                                                                                                           |
| 4.  | Bavishi, Aakash, et al. “Systematic Examination of a Heart Failure Risk Prediction Tool: The Pooled Cohort Equations to Prevent Heart Failure.” <i>PloS One</i> , vol. 15, no. 11, 2020, p. e0240567.                                                                                                                                                                                           |
| 5.  | Berezin, Alex, et al. “The Utility of Biomarker Risk Prediction Score in Patients with Chronic Heart Failure.” <i>Clinical Hypertension</i> , vol. 22, no. 1, 2015, pp. 1–11.                                                                                                                                                                                                                   |
| 6.  | Brouwers, Frank P., et al. “Clinical Risk Stratification Optimizes Value of Biomarkers to Predict New-Onset Heart Failure in a Community-Based Cohort.” <i>Circulation: Heart Failure</i> , vol. 7, no. 5, 2014, pp. 723–31.                                                                                                                                                                    |
| 7.  | Gary, T., et al. “CHA2DS2-VASc Score and Risk for Reobstruction after Endovascular Treatment of the Superficial Femoral Artery: Differences between Balloon Angioplasty and Stenting.” <i>Journal of Thrombosis and Haemostasis</i> , vol. 11, July , p. 387.                                                                                                                                   |
| 8.  | Iacovoni, A., et al. “Natriuretic Peptides and the Framingham Risk Score for Screening of Asymptomatic Left Ventricular Systolic Dysfunction in High-Risk Patients in Primary Care. The DAVID-BERG Study.” <i>International Journal of Cardiology</i> , vol. 168, no. 5, 12, pp. 5093–95.                                                                                                       |
| 9.  | JV, Wylie, et al. “Validated Risk Score Predicts the Development of Congestive Heart Failure after Presentation with Unstable Angina or Non-ST-Elevation Myocardial Infarction: Results from OPUS-TIMI 16 and TACTICS-TIMI 18.” <i>American Heart Journal</i> , vol. 148, no. 1, 2004, pp. 173–80.                                                                                              |
| 10. | Khan, Sadiya S., et al. “10-Year Risk Equations for Incident Heart Failure in the General Population.” <i>Journal of the American College of Cardiology</i> , vol. 73, no. 19, 2019, pp. 2388–97.                                                                                                                                                                                               |
| 11. | L, Wang, et al. “Predicting Risk of Hospitalization or Death among Patients with Heart Failure in the Veterans Health Administration.” <i>The American Journal of Cardiology</i> , vol. 110, no. 9, 2012, pp. 1342–49.                                                                                                                                                                          |
| 12. | Montero-Perez-Barquero, Manuel, et al. “Utility of the SENIORS Elderly Heart Failure Risk Model Applied to the RICA Registry of Acute Heart Failure.” <i>International Journal of Cardiology</i> , vol. 182, 2015, pp. 449–53.                                                                                                                                                                  |



|                                    |                                                                                                                                                                                                                                                                                                                                                                                                                     |
|------------------------------------|---------------------------------------------------------------------------------------------------------------------------------------------------------------------------------------------------------------------------------------------------------------------------------------------------------------------------------------------------------------------------------------------------------------------|
| 13.                                | Naccarelli, G. V., M. P. Panaccio, et al. "CHADS2 and CHA2DS2-VASc Risk Factors to Predict First Cardiovascular Hospitalization among Atrial Fibrillation/Atrial Flutter Patients." <i>American Journal of Cardiology</i> , vol. 109, no. 10, May , pp. 1526–33.                                                                                                                                                    |
| 14.                                | Naccarelli, G. V., G. Cummins, et al. "CHADS2 Risk Factors Predict Cardiovascular Hospitalization among Atrial Fibrillation/Atrial Flutter Patients." <i>Heart Rhythm</i> , vol. 8, no. 5, May , p. S337.                                                                                                                                                                                                           |
| 15.                                | Nozaki, Toshimitsu, et al. "Significance of a Multiple Biomarkers Strategy Including Endothelial Dysfunction to Improve Risk Stratification for Cardiovascular Events in Patients at High Risk for Coronary Heart Disease." <i>Journal of the American College of Cardiology</i> , vol. 54, no. 7, 2009, pp. 601–08.                                                                                                |
| 16.                                | P, et al. "Biomarker-Based Risk Prediction of Incident Heart Failure in Pre-Diabetes and Diabetes." <i>JACC: Heart Failure</i> , 2021.                                                                                                                                                                                                                                                                              |
| 17.                                | "Plasma Concentration of Amino-Terminal pro-Brain Natriuretic Peptide in Chronic Heart Failure: Prediction of Cardiovascular Events and Interaction with the Effects of Rosuvastatin: A Report from CORONA (Controlled Rosuvastatin Multinational Trial in Heart Failure)." <i>Journal of the American College of Cardiology</i> , vol. 54, no. 20, 2009, pp. 1850–59.                                              |
| 18.                                | Protasov, V. N., et al. "Multimarker Approach in Risk Stratification of Patients with Decompensated Heart Failure." <i>Kardiologiia</i> , vol. 59, no. 1, 2019, pp. 53–64.                                                                                                                                                                                                                                          |
| 19.                                | Sabatine, Marc S., et al. "Multimarker Approach to Risk Stratification in Non-ST Elevation Acute Coronary Syndromes: Simultaneous Assessment of Troponin I, C-Reactive Protein, and B-Type Natriuretic Peptide." <i>Circulation</i> , vol. 105, no. 15, 2002, pp. 1760–63.                                                                                                                                          |
| 20.                                | Schildcrout, J. S., et al. "A Prognostic Model Based on Readily Available Clinical Data Enriched a Pre-Emptive Pharmacogenetic Testing Program." <i>Journal of Clinical Epidemiology</i> , vol. 72, 1, pp. 107–15.                                                                                                                                                                                                  |
| 21.                                | Scirica, B. M., et al. "A Diabetes Risk Score for Cardiovascular Events in Primary and Secondary Prevention-Observations from the SAVOR-TIMI 53 Study." <i>Diabetes</i> , vol. 64, June , p. A113.                                                                                                                                                                                                                  |
| 22.                                | Spinar, Jindrich, et al. "AHEAD Score—Long-Term Risk Classification in Acute Heart Failure." <i>International Journal of Cardiology</i> , vol. 202, 2016, pp. 21–26.                                                                                                                                                                                                                                                |
| 23.                                | Tsang, Teresa SM, et al. "Prediction of Risk for First Age-Related Cardiovascular Events in an Elderly Population: The Incremental Value of Echocardiography." <i>Journal of the American College of Cardiology</i> , vol. 42, no. 7, 2003, pp. 1199–205.                                                                                                                                                           |
| 24.                                | Tse, G., et al. "The CHADS2 and CHA2DS2-VASc Scores for Predicting Healthcare Utilization and Outcomes: Observations on the Appropriate Use and Misuse of Risk Scores." <i>International Journal of Cardiology</i> , vol. 245, 15, pp. 181–82.                                                                                                                                                                      |
| 25.                                | Tse, Gary, et al. "Multi-Modality Machine Learning Approach for Risk Stratification in Heart Failure with Left Ventricular Ejection Fraction $\leq$ 45%." <i>ESC Heart Failure</i> , vol. 7, no. 6, 2020, pp. 3716–25.                                                                                                                                                                                              |
| 26.                                | Wamil, M., et al. "Predicting Heart Failure Events in Patients with Coronary Heart Disease and Impaired Glucose Tolerance: Insights from the Acarbose Cardiovascular Evaluation (ACE) Trial." <i>Diabetes Research and Clinical Practice</i> , vol. 170, Dec. .                                                                                                                                                     |
| 27.                                | Y, Wu, et al. "Estimation of 10-Year Risk of Fatal and Nonfatal Ischemic Cardiovascular Diseases in Chinese Adults." <i>Circulation</i> , vol. 114, no. 21, 2006, pp. 2217–25.                                                                                                                                                                                                                                      |
| <b>EXCLUDED: NOT ORIGINAL DATA</b> |                                                                                                                                                                                                                                                                                                                                                                                                                     |
| 1.                                 | Al-Lawati, J. A., et al. "Cardiovascular Risk Assessment in Diabetes Mellitus: Comparison of the General Framingham Risk Profile versus the World Health Organization/ International Society of Hypertension Risk Prediction Charts in Arabs - Clinical Implications." <i>Angiology</i> , vol. 64, no. 5, July , pp. 336–42.                                                                                        |
| 2.                                 | Almeda-Valdes, P., et al. "UKPDS Risk Engine, DECODE and Diabetes PHD Models for the Estimation of Cardiovascular Risk in Patients with Diabetes." <i>Current Diabetes Reviews</i> , vol. 6, no. 1, Jan. , pp. 1–8.                                                                                                                                                                                                 |
| 3.                                 | Angelidi, A., et al. "Association and Predictability of the Novel ASCVD Risk Score in the Establishment of Heart Failure in Patients with Type 2 Diabetes: Data from a 10-Year Prospective Study." <i>European Journal of Heart Failure</i> , vol. 16, May , p. 345.                                                                                                                                                |
| 4.                                 | Cannistraci, R., et al. "Risk Stratification Tools for Heart Failure in the Diabetes Clinic." <i>Nutrition Metabolism and Cardiovascular Diseases</i> , vol. 30, no. 7, June , pp. 1070–79.                                                                                                                                                                                                                         |
| 5.                                 | Coleman, R. L., et al. "Estimating Cardiovascular Risk in People with Type 2 Diabetes and Cardiovascular Disease: UKPDS Outcomes Model." <i>Diabetes. Conference: 79th Scientific Sessions of the American Diabetes Association, ADA</i> , vol. 68, 2019, <a href="https://diabetes.diabetesjournals.org/content/68/Supplement_1/1466-P">https://diabetes.diabetesjournals.org/content/68/Supplement_1/1466-P</a> . |
| 6.                                 | Collins, Sean P., and Alan B. Storrow. "Moving toward Comprehensive Acute Heart Failure Risk Assessment in the Emergency Department: The Importance of Self-Care and Shared Decision Making." <i>JACC: Heart Failure</i> , vol. 1, no. 4, 2013, pp. 273–80.                                                                                                                                                         |

|                                                                       |                                                                                                                                                                                                                                                                                                                                  |
|-----------------------------------------------------------------------|----------------------------------------------------------------------------------------------------------------------------------------------------------------------------------------------------------------------------------------------------------------------------------------------------------------------------------|
| 7.                                                                    | Davis, T., and W. A. Davis. "Predictors and Outcome of Heart Failure Complicating Type 2 Diabetes: The Fremantle Diabetes Study." <i>Diabetes</i> , vol. 64, June , p. A387.                                                                                                                                                     |
| 8.                                                                    | Davis, W. A., et al. "A Contemporary Australian Cardiovascular Risk Equation for Type 2 Diabetes: The Fremantle Diabetes Study Phase II." <i>Diabetologia</i> , vol. 61, Oct. , pp. S575–76.                                                                                                                                     |
| 9.                                                                    | Fadini, G. P., et al. "Intraclass Differences in the Risk of Hospitalization for Heart Failure among Patients with Type 2 Diabetes Initiating a Dipeptidyl Peptidase-4 Inhibitor or a Sulphonylurea: Results from the OsMed Health-DB Registry." <i>Diabetes Obesity &amp; Metabolism</i> , vol. 19, no. 10, Oct. , pp. 1416–24. |
| 10.                                                                   | Jarolim, P., et al. "Prognostic Implications of Simultaneous Biomarker Assessments in Patients with Type 2 Diabetes Mellitus - Observations from the SAVOR-TIMI 53 Trial." <i>Clinical Chemistry</i> , vol. 1, 2014, p. S232.                                                                                                    |
| 11.                                                                   | Lau, Y. C., and G. Y. Lip. "Post Myocardial Infarction and Atrial Fibrillation: Thromboprophylaxis and Risk Stratification Using the CHA2DS2-VASc Score." <i>Cardiology Journal</i> , vol. 21, no. 5, 2014, pp. 451–53.                                                                                                          |
| 12.                                                                   | McEwan, P., et al. "Modelling Cardiovascular Outcomes in Type 2 Diabetes in the Era of Cardiovascular Outcomes Trials." <i>Value in Health</i> , vol. 20, Oct. , p. A747.                                                                                                                                                        |
| 13.                                                                   | Petretta, M., et al. "Cardiovascular Risk Stratification in Diabetic Patients." <i>Clinical and Translational Imaging</i> , vol. 1, no. 5, 1, pp. 325–39.                                                                                                                                                                        |
| 14.                                                                   | Scirica, B. M. "Use of Biomarkers in Predicting the Onset, Monitoring the Progression, and Risk Stratification for Patients with Type 2 Diabetes Mellitus." <i>Clinical Chemistry</i> , vol. 63, no. 1, Jan. , pp. 186–95.                                                                                                       |
| 15.                                                                   | Targher, G., and C. D. Byrne. "Treatment Algorithm in Patients with Type 2 Diabetes and Atherosclerotic Cardiovascular Disease or High/Very High Cardiovascular Risk." <i>European Heart Journal</i> , vol. 41, no. 2, 1, p. 331.                                                                                                |
| 16.                                                                   | Verma, Subodh, et al. "Predictors of Heart Failure Development in Type 2 Diabetes: A Practical Approach." <i>Current Opinion in Cardiology</i> , vol. 34, no. 5, 2019, p. 578.                                                                                                                                                   |
| 17.                                                                   | Wang, Juan, et al. "Novel Biomarkers for Cardiovascular Risk Prediction." <i>Journal of Geriatric Cardiology: JGC</i> , vol. 14, no. 2, 2017, p. 135.                                                                                                                                                                            |
| <b>EXCLUDED: INSUFFICIENT INFORMATION FOR ACTUAL USE</b>              |                                                                                                                                                                                                                                                                                                                                  |
| 1.                                                                    | Dworzynski, P., et al. "Nationwide Prediction of Type 2 Diabetes Comorbidities." <i>Scientific Reports</i> , vol. 10, no. 1, Feb. .                                                                                                                                                                                              |
| 2.                                                                    | Ferket, B. S., et al. "Lifetime Predictions of Coronary Heart Disease, Congestive Heart Failure, and Stroke to Enable Preventive Treatment Decisions in Type 2 Diabetes Patients." <i>Circulation. Conference: American Heart Association's</i> , vol. 134, 2016.                                                                |
| 3.                                                                    | Ferreira, J. P., et al. "Multi-Proteomic Approach to Predict Specific Cardiovascular Events in Patients with Diabetes and Myocardial Infarction: Findings from the EXAMINE Trial." <i>Clinical Research in Cardiology</i> , vol. 13, Aug. , p. 13.                                                                               |
| 4.                                                                    | Gori, Mauro, et al. "Natriuretic Peptide and High-Sensitivity Troponin for Cardiovascular Risk Prediction in Diabetes: The Atherosclerosis Risk in Communities (ARIC) Study." <i>Diabetes Care</i> , vol. 39, no. 5, 2016, pp. 677–85.                                                                                           |
| 5.                                                                    | Hong, D., et al. "Pdb130 Risk Equations for Complications of Type2 Diabetes Using Real-World Electronic Medical Records: Localized Vs. Generalizable." <i>Value in Health</i> , vol. 22, May , p. S162.                                                                                                                          |
| 6.                                                                    | Ohkuma, T., et al. "Cardiac Stress and Inflammatory Markers as Predictors of Heart Failure in Patients With Type 2 Diabetes: The ADVANCE Trial." <i>Diabetes Care</i> , vol. 40, no. 9, Sept. , pp. 1203–09.                                                                                                                     |
| 7.                                                                    | Patel, T., et al. "Predictors of Hospitalization or Death Due to Heart Failure in Diabetic Patients by Gender in the Accord Trial Using Random Survival Forests." <i>Circulation. Conference: Resuscitation Science Symposium, ReSS</i> , vol. 136, 2017.                                                                        |
| 8.                                                                    | Scirica, B., et al. "Prognostic Implications of Simultaneous Biomarker Assessments in Patients with Type 2 Diabetes Mellitus: Observations from the Savor-TIMI 53 Trial." <i>Journal of the American College of Cardiology</i> , vol. 63, no. 12, 1, p. A1550.                                                                   |
| 9.                                                                    | Shao, H., et al. "Globalization Module for a Diabetes Progression Prediction Model: The Building, Relating, Acting, and Validating Outcomes (BRAVO) Model." <i>Value in Health</i> , vol. 21, May , p. S5.                                                                                                                       |
| 10.                                                                   | Sharma, A., et al. "Prognostic Utility of GDF-15 in Chronic Heart Failure: Insights from the HF-ACTION Study." <i>European Heart Journal</i> , vol. 37, Aug. , p. 441.                                                                                                                                                           |
| 11.                                                                   | Ward, T., et al. "Investigating the Validity of the UKPDS Outcomes Equations in Current Clinical Practice." <i>Diabetologia</i> , vol. 56, Sept. , pp. S13–14.                                                                                                                                                                   |
| 12.                                                                   | Wells, B. J., et al. "Prediction of Morbidity and Mortality in Patients with Type 2 Diabetes." <i>Peerj</i> , vol. 1, June.                                                                                                                                                                                                      |
| <b>EXCLUDED: DUPLICATES NOT REMOVED AT TITLE / ABSTRACT SCREENING</b> |                                                                                                                                                                                                                                                                                                                                  |

|                                               |                                                                                                                                                                                                                                                                                                                                                                                            |
|-----------------------------------------------|--------------------------------------------------------------------------------------------------------------------------------------------------------------------------------------------------------------------------------------------------------------------------------------------------------------------------------------------------------------------------------------------|
| 1.                                            | Berg, D., et al. "Heart Failure Risk Stratification and Efficacy of Dapagliflozin in Patients with Type 2 Diabetes Mellitus." <i>European Heart Journal</i> , vol. 40, Oct. , p. 153.                                                                                                                                                                                                      |
| 2.                                            | Elharram, M., et al. "Predicting Heart Failure Hospitalization in Type 2 Diabetes Mellitus: Validation of the TRS-HFDM Score in the ACCORD Trial." <i>Circulation</i> , vol. 142, Nov. .                                                                                                                                                                                                   |
| 3.                                            | Hayden, Jennifer D., et al. <i>404-P: Cardiovascular Risk Scoring and Stratification in Patients with Type 2 Diabetes Enrolled in a Medicare Advantage Plan</i> . Am Diabetes Assoc, 2020.                                                                                                                                                                                                 |
| 4.                                            | Idzerda, N. M. A., et al. "Prediction of the Effect of Dapagliflozin on Kidney and Heart Failure Outcomes Based on Short-Term Changes in Multiple Risk Markers." <i>Nephrology Dialysis Transplantation</i> , vol. 35, no. 9, Sept. , pp. 1570–76.                                                                                                                                         |
| 5.                                            | Naccarelli, G. V., et al. "CHADS2 and CHA2DS2-VASc Risk Factors to Predict First Cardiovascular Hospitalization among Atrial Fibrillation/Atrial Flutter Patients." <i>American Journal of Cardiology</i> , vol. 109, no. 10, 15, pp. 1526–33.                                                                                                                                             |
| 6.                                            | R, Pfister, et al. "A Clinical Risk Score for Heart Failure in Patients with Type 2 Diabetes and Macrovascular Disease: An Analysis of the PROactive Study." <i>International Journal of Cardiology</i> , vol. 162, no. 2, 2013, pp. 112–16.                                                                                                                                               |
| 7.                                            | Sharma, A., et al. "Evaluating Expanded Heart Failure Outcomes in Patients with Type 2 Diabetes after an Acute Coronary Syndrome: Insights from the Examine Trial." <i>Circulation. Conference: Resuscitation Science Symposium, ReSS</i> , vol. 136, 2017.                                                                                                                                |
| 8.                                            | Williams, B. A., et al. "A Risk Prediction Model for Heart Failure Hospitalization in Type 2 Diabetes Mellitus." <i>Clinical Cardiology</i> , vol. 43, no. 3, Mar. , pp. 275–83.                                                                                                                                                                                                           |
| 9.                                            | X, Yang, et al. "Development and Validation of a Risk Score for Hospitalization for Heart Failure in Patients with Type 2 Diabetes Mellitus." <i>Cardiovascular Diabetology</i> , vol. 7, 2008, p. 9.                                                                                                                                                                                      |
| <b>EXCLUDED: MISSING PERFORMANCE MEASURES</b> |                                                                                                                                                                                                                                                                                                                                                                                            |
| 1.                                            | Idzerda, N., et al. "Prediction of the Effect of Dapagliflozin on Renal and Heart Failure Outcomes Based on Short-Term Changes in Multiple Risk Markers." <i>Journal of the American Society of Nephrology</i> , vol. 29, 2018, p. 10.                                                                                                                                                     |
| 2.                                            | Scott, C. A. B., et al. "Predictors of Incident Hospitalization for Heart Failure in the ACE Trial Population." <i>Diabetes. Conference: 79th Scientific Sessions of the American Diabetes Association, ADA</i> , vol. 68, 2019, <a href="https://diabetes.diabetesjournals.org/content/68/Supplement_1/1479-P">https://diabetes.diabetesjournals.org/content/68/Supplement_1/1479-P</a> . |
| 3.                                            | Verma, S., et al. "Application of the Timi Heart Failure Risk Score to the Empa-Reg Outcome Population." <i>Journal of the American College of Cardiology</i> , vol. 75, 24, p. 1851.                                                                                                                                                                                                      |
| 4.                                            | Verma, S., et al. "Empagliflozin Reduces the Risk of Mortality and Hospitalization for Heart Failure across Thrombolysis In Myocardial Infarction Risk Score for Heart Failure in Diabetes Categories: Post Hoc Analysis of the EMPA-REG OUTCOME Trial." <i>Diabetes Obesity &amp; Metabolism</i> , vol. 22, no. 7, July , pp. 1141–50.                                                    |
| 5.                                            | Zethelius, B., et al. "Impact of Socioeconomic Status and Ethnicity on Risk of Stroke, Hospitalisation for Heart Failure and Death in 371,092 Individuals with Type 2 Diabetes." <i>Diabetologia</i> , vol. 58, no. 1, Sept. , p. S433.                                                                                                                                                    |
| 6.                                            | Scirica, B. M., et al. "Prognostic Implications of Biomarker Assessments in Patients With Type 2 Diabetes at High Cardiovascular Risk A Secondary Analysis of a Randomized Clinical Trial." <i>Jama Cardiology</i> , vol. 1, no. 9, Dec. , pp. 989–98.                                                                                                                                     |
| 7.                                            | Shao, H., et al. "Using the BRAVO Risk Engine to Predict Cardiovascular Outcomes in Clinical Trials With Sodium-Glucose Transporter 2 Inhibitors." <i>Diabetes Care</i> , vol. 43, no. 7, July , pp. 1530–36.                                                                                                                                                                              |

**Figure S1. Risk of Bias and Applicability of Included Clinical Prediction Model Development Studies.**

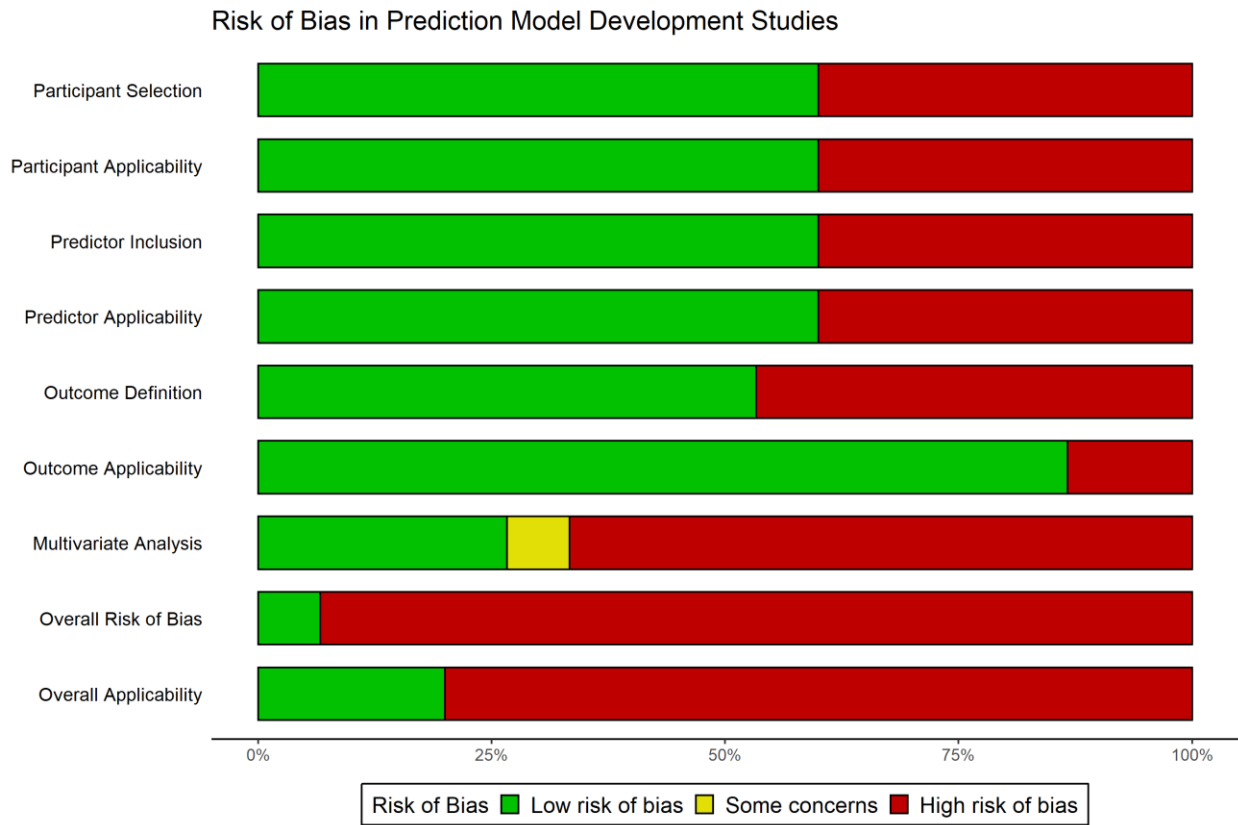

**Figure S2. Risk of Bias and Applicability of Included Clinical Prediction Model Validation Studies.**

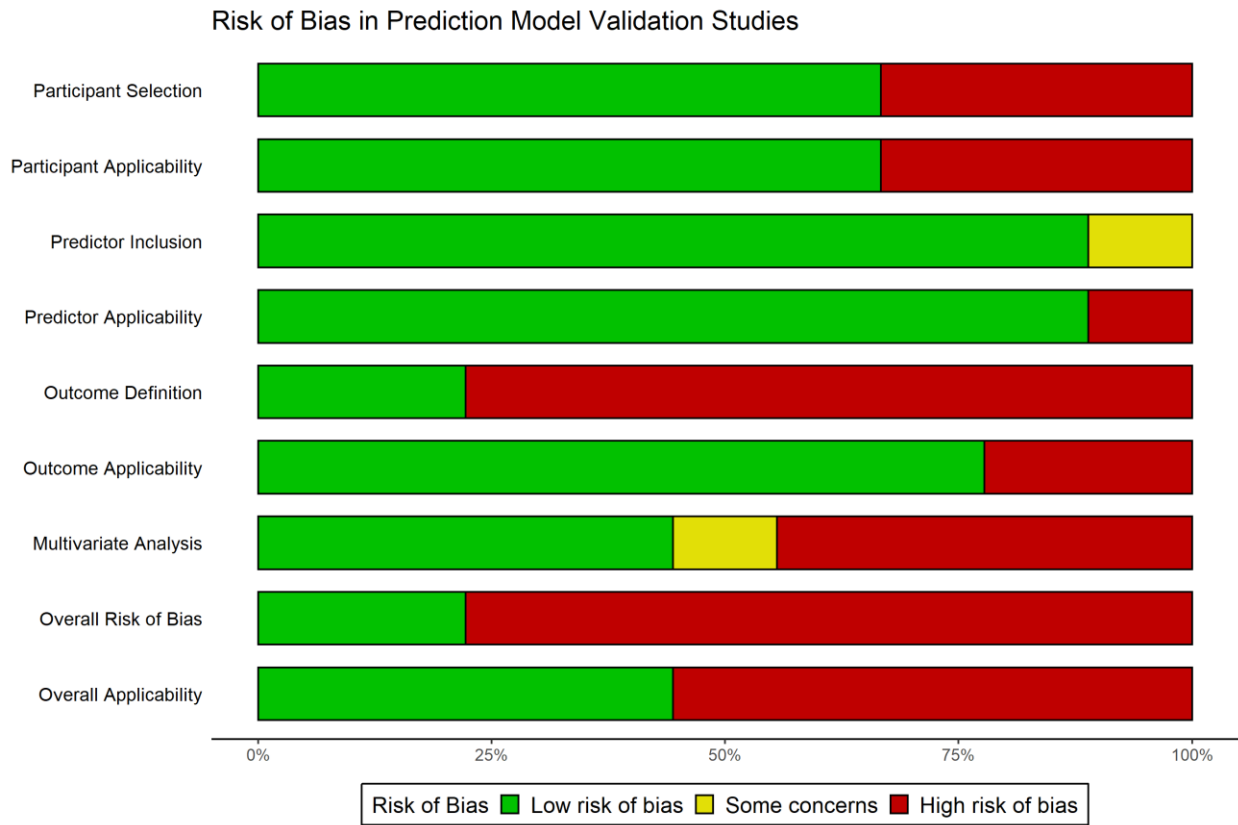

**Figure S3. Risk of Bias and Applicability of Included Clinical Prediction Model Development Studies.**

| Study                          | Risk of bias domains |    |    |    | Overall Risk of Bias | Applicability domains |    |    | Overall Applicability |
|--------------------------------|----------------------|----|----|----|----------------------|-----------------------|----|----|-----------------------|
|                                | D1                   | D2 | D3 | D4 |                      | D1                    | D2 | D3 |                       |
| Willis 2021 Development        | +                    | +  | +  | X  | X                    | +                     | +  | +  | X                     |
| Williams 2019 Development      | X                    | +  | +  | X  | X                    | X                     | +  | +  | X                     |
| TRSHFDM 2019 Development       | +                    | +  | X  | X  | X                    | +                     | +  | +  | +                     |
| Sharma 2019 Development        | X                    | X  | X  | X  | X                    | X                     | X  | +  | X                     |
| Segar 2018 Development         | X                    | X  | +  | X  | X                    | X                     | X  | +  | X                     |
| Kim 2018 Development           | X                    | +  | X  | +  | X                    | X                     | +  | +  | X                     |
| Fraty 2018 Development         | +                    | X  | X  | -  | X                    | +                     | X  | X  | X                     |
| Bravo 2018 Development         | +                    | +  | X  | +  | X                    | +                     | +  | +  | +                     |
| Wolsk 2017 Development         | +                    | X  | X  | X  | X                    | +                     | X  | +  | X                     |
| Halon 2017 Development         | +                    | X  | +  | X  | X                    | +                     | X  | +  | X                     |
| Basu 2017 Development          | +                    | +  | +  | +  | +                    | +                     | +  | +  | +                     |
| Hippisley Cox 2015 Development | +                    | +  | +  | X  | X                    | +                     | +  | X  | X                     |
| Pfister 2013 Development       | X                    | X  | +  | +  | X                    | X                     | X  | +  | X                     |
| Kiadaliri 2013 Development     | +                    | +  | X  | X  | X                    | +                     | +  | +  | X                     |
| Yang 2008 Development          | X                    | +  | +  | X  | X                    | X                     | +  | +  | X                     |

D1: Participant Selection  
 D2: Predictor Inclusion  
 D3: Outcome Definition  
 D4: Multivariate Analysis

D1: Participant Applicability  
 D2: Predictor Applicability  
 D3: Outcome Applicability

**Judgement**  
 X High  
 - Unclear  
 + Low

**Figure S4. Risk of Bias and Applicability of Included Clinical Prediction Model Validation Studies.**

| Study                                | Risk of bias domains |    |    |    | Overall Risk of Bias | Applicability domains |    |    | Overall Applicability |
|--------------------------------------|----------------------|----|----|----|----------------------|-----------------------|----|----|-----------------------|
|                                      | D1                   | D2 | D3 | D4 |                      | D1                    | D2 | D3 |                       |
| TRSHFDM 2019 Validation              | +                    | +  | X  | X  | X                    | +                     | +  | +  | +                     |
| TRSHFDM 2020 Validation (Elharram)   | +                    | +  | X  | X  | X                    | +                     | +  | +  | +                     |
| TRSHFDM 2021 Validation (Razaghizad) | +                    | +  | X  | +  | X                    | X                     | +  | +  | X                     |
| Segar 2018 Validation                | X                    | +  | X  | X  | X                    | +                     | X  | X  | X                     |
| Kim 2018 Validation                  | X                    | +  | X  | X  | X                    | X                     | +  | +  | X                     |
| Bravo 2018 Validation                | +                    | +  | X  | -  | X                    | X                     | +  | +  | X                     |
| Basu 2017 Validation                 | +                    | +  | +  | +  | +                    | +                     | +  | +  | +                     |
| Basu 2018 Validation                 | +                    | +  | +  | +  | +                    | +                     | +  | +  | +                     |
| Hippisley Cox 2015 Validation        | X                    | -  | X  | +  | X                    | +                     | +  | X  | X                     |

D1: Participant Selection  
D2: Predictor Inclusion  
D3: Outcome Definition  
D4: Multivariate Analysis

D1: Participant Applicability  
D2: Predictor Applicability  
D3: Outcome Applicability

Judgement  
X High  
- Unclear  
+ Low
